## Children hospitalized for COVID-19 during first winter of the pandemic in Buenos Aires, Argentina

Silvina Raiden<sup>1</sup>, Hector Cairoli<sup>1</sup>, Javier Potasnik<sup>1</sup>, Sandra Di Lalla<sup>1</sup>, María José Chiolo<sup>1</sup>, Fernando Torres<sup>2</sup>, Paula Dominguez<sup>2</sup>, Fernando Ferrero<sup>1</sup>

<sup>1</sup>Departamento de Medicina, Hospital General de Niños Pedro de Elizalde, Buenos Aires, Argentina; <sup>2</sup>Docencia e Investigación, Hospital General de Niños Pedro de Elizalde, Buenos Aires, Argentina

**Correspondent author:** Fernando Ferrero ([fferrero@intramed.net](mailto:fferrero@intramed.net))  
Hospital General de Niños Pedro de Elizalde  
Av. Montes de Oca 40, Buenos Aires, Argentina

### ABSTRACT

**Background:** Although there are reports on COVID-19 in pediatrics, it is possible that the characteristics of each population, their health systems and how they faced the pandemic made the disease show distinctive features in different countries.

We aimed to describe the characteristics of patients hospitalized for COVID-19 in a tertiary pediatric hospital in the City of Buenos Aires, Argentina.

**Methods:** Descriptive study, including all patients hospitalized for COVID-19 in a tertiary pediatric hospital, from 04/26/2020 to 10/31/2020. Demographic, clinical and epidemiological characteristics of the patients are described.

**NOTE:** This preprint reports new research that has not been certified by peer review and should not be used to guide clinical practice.

**Results:** In the studied period 578 patients were hospitalized for COVID-19. The median age was 4.2 years and 83% had a history of close contact with a confirmed COVID-19 case. Regarding severity, 30.8% were asymptomatic, 60.4% mild, 7.4% moderate, and 1.4% severe. Among those with symptoms, the most frequent was fever, followed by sore throat and cough.

**Conclusion:** We reported 578 cases of children and adolescents hospitalized for COVID-19, most of them showed a mild or asymptomatic condition.

**Keywords:** Coronavirus infection; COVID-19; pneumonia

## **INTRODUCTION**

Despite the COVID-19 pandemic has caused hundreds of thousands of deaths worldwide, the information available to date shows that the disease is less severe in the pediatric population [1,2].

Also, there are reports that seem to show that the development of the pandemic may be influenced by the characteristics of each country, their health systems and how they faced the pandemic [3,4].

In addition to the characteristics of their own population and health system, Argentina faced the pandemic in a particular way, including the longest lockdown [5] and mandatory hospitalization of affected infants, regardless of its severity [6]. These characteristics could give a distinctive feature to children hospitalized for this disease.

We aimed to describe the characteristics of patients hospitalized for COVID-19 in a pediatric tertiary hospital in the City of Buenos Aires.

## **METHODS**

Descriptive study, including all patients hospitalized for COVID-19 at the Hospital General de Niños Pedro de Elizalde, Buenos Aires, from April 26 to October 31, 2020. The diagnosis was made by identification of SARS-CoV-2 in nasopharyngeal secretions by RT-PCR.

In all cases, sex, age, place of residence (including whether they lived in a poor neighborhood [7]), time of symptoms onset on admission, close contact with a confirmed COVID-19 case, presence of comorbidity and length of hospitalization was registered.

Severity was assessed as described by Dong [8]; patients presenting with SARS-CoV-2-related multisystemic inflammatory syndrome (MIS-C) were considered severe/critical.

Lab tests were also recorded (hemoglobin, differential WBC count, platelets, C-reactive protein, and erythrocyte sedimentation rate).

**Analysis:** Categorical variables are described by proportions with 95% confidence intervals (95% CI) and continuous variables with mean and standard deviation or median and interquartile range, according to distribution (Kolmogorov-Smirnov test). IBM SPSS Statistics 20.0 was used.

**Ethics:** The study was approved by the Institution Ethics Committee.

## RESULTS

In the studied period, 578 children and adolescents were hospitalized for COVID-19. The number of hospitalizations per week ranged between 2 and 42. (Figure 1)

The median age was 4.2 (IIC: 0.7-11.2) years and 54.5% were male. Sixty-seven percent (67.3%) had their residence within the jurisdiction of the hospital (City of Buenos Aires) and, of them, 23.1% lived in a poor neighborhood.

Eighty-three percent (83%) had a history of close contact with a confirmed COVID-19 case. The time of symptoms onset before admission was 1 day (IIC: 1-3). Thirty-five percent (35.3%) had a previous or concomitant diagnosis of other disease, asthma being the most frequent (n = 49) (Table 1).

Disease severity was assessed and 30.8% were considered asymptomatic, 60.4% mild, 7.4% moderate, and 1.4% severe. From the six severe cases, only one required assisted ventilation, and two presented with SARS-CoV-2-related multisystemic inflammatory syndrome (MIS-C). Other six MIS-C cases were admitted to the hospital but SARS-CoV-2 testing was negative.

The most frequent initial symptom was fever, followed by sore throat and cough (Table 2).

Regarding the lab tests, we found that 9% showed lymphopenia (lymphocyte differential count <20%) and 23.8% elevated C-reactive protein values (C-reactive protein > 10 mg/dl) (being 100% among severe cases and 10% among asymptomatics)(Table 3).

The length of stay had a median of 6 days (IIC: 2.2-9).

At the time of this report, only one patient with COVID 19 died, due to causes other than the disease, since he was in end-of-life care. All patients were discharged without complications (with phone follow-up), except those whose comorbidity prevented it.

## **DISCUSSION**

Our study strengthens the idea that COVID 19 in pediatrics is, in general, mild. It also supports some characteristics of the disease in Argentina that a previous report has suggested [9].

Although it is possible that the age structure (Argentina has twice the number of children under 15 years of age than Italy) and the social behaviour of the different populations influence the differences observed [10] [11], the way in which local health authorities dealt with the pandemic have generated some particular features in our patients. We found more pediatric cases than other countries and a higher proportion of asymptomatic and mild among those hospitalized.

The City of Buenos Aires, adopted a “test and trace” policy. This program was carried out more strongly in poor neighborhoods, which have a younger population [12]. Mandatory hospitalization was also established for infants, still asymptomatic [6] [13]. Furthermore, those asymptomatic children and adolescents who did not have home conditions to comply with out-of-hospital isolation, were hospitalized for the isolation period [14].

In the period covered by this report (until 10/31/2020) the City of Buenos Aires reported 147,363 cases, of which 12.1% were children and adolescents [15], a substantially higher proportion than that initially reported in China (2.1 %) [16] and Italy [17], but closer to that lately reported in the USA (9%) [18].

We found a high proportion of asymptomatic patients (30.8%), higher than that reported by Göttinger in Europe in 582 children with SARS-CoV-2 infection (16%) [19], probably related to the above mentioned test and trace and institutional isolation policies adopted by the health authorities.

We only found 5.6% moderate and 1.2% severe cases. Dong et al. in China reported 5.9% severe and critical cases [8] and Tagarro in Spain reports that 9.7% of the cases in his series were severe [20]. Although a report from the United States showed that 32% of hospitalized pediatric patients with COVID-19 were admitted to the PICU, the limited average length of stay (2 days) and the limited proportion of subjects who required assisted ventilation (5.8%) suggests that the admission criteria in this series were broader [21].

Regarding the cases of MIS-C (COVID-19 associated Multisystem Inflammatory Syndrome in Children) that we report, they presented 4 to 6 weeks after reaching a significant number of cases in our city, a moment described as usual for the development of this complication [22].

Finally, we have that 83% of our patients had close contact with infected people, supporting the idea that children are usually infected from adults [23].

This study has the limitation of presenting data from a single center, although it is probably the public institution that has hospitalized the most pediatric patients with COVID-19 in our country.

## **CONCLUSION**

In this study we report 578 cases of children and adolescents hospitalized for COVID-19 in Argentina. Most presented their disease as mild or asymptomatic.

## REFERENCES

1. Ludvigsson JF. Systematic review of COVID-19 in children shows milder cases and a better prognosis than adults. *Acta Paediatr.* 2020; 109(6):1088-1095.
2. Hoang A, Chorath K, Moreira A, Evans M, Burmeister-Morton F, Burmeister F, Naqvi R, Petershack M, Moreira A. COVID-19 in 7780 pediatric patients: A systematic review. *EClinicalMedicine.* 2020 Jun 26;24:100433.
3. Smit AJ, Fitchett JM, Engelbrecht FA, Scholes RJ, Dzhivhuho G, Sweijd NA. Winter Is Coming: A Southern Hemisphere Perspective of the Environmental Drivers of SARS-CoV-2 and the Potential Seasonality of COVID-19. *Int J Environ Res Public Health.* 2020;17(16):E5634.
4. Tanne JH, Hayasaki E, Zastrow M, Pulla P, Smith P, Rada AG. Covid-19: how doctors and healthcare systems are tackling coronavirus worldwide. *BMJ.* 2020;368:m1090.
5. Pieper O. Coronavirus: Argentina 's never-ending quarantine. *Deutsche Welle.* 2020 Aug 27. [cited 2020 Nov 01]. Available from: <https://www.dw.com/en/coronavirus-argentinas-never-ending-quarantine/a-54721129>.
6. Ministerio de Salud, Gobierno de la Ciudad Autónoma de Buenos Aires. Manejo frente a casos sospechosos y confirmados de coronavirus (COVID 19) en pediatría.

- V.3. 8 de Mayo de 2020. pp 6. [cited 2020 Nov 02]. Available from <https://www.buenosaires.gob.ar/sites/gcaba/files/p.pediatria8.05.pdf>.
7. Ministerio de Desarrollo Territorial y Hábitat. Registro Nacional de Barrios Populares. [cited 2020 Jun 25]. Available from: <https://www.argentina.gob.ar/habitat/renabap>.
  8. Dong Y, Mo X, Hu Y, Qi X, Jiang F, Jiang Z, Tong S. Epidemiology of COVID-19 Among Children in China. *Pediatrics*. 2020, 145 (6) e20200702.
  9. Cairoli H, Raiden S, Chiolo MJ, Di Lalla S, Ferrero F. Patients assisted at the Department of Medicine of a pediatric hospital at the beginning of the COVID-19 pandemic in Buenos Aires, Argentina. *Arch Argent Pediatr* 2020;118(6):418-426.
  10. Natale F, Ghio D, Tarchi D, Goujon D, Conte A. COVID-19 Cases and Case Fatality Rate by age. [cited 2020 Nov 02] Available from: [https://ec.europa.eu/knowledge4policy/sites/know4pol/files/jrc120420\\_covid\\_risk\\_and\\_age.pdf](https://ec.europa.eu/knowledge4policy/sites/know4pol/files/jrc120420_covid_risk_and_age.pdf).
  11. Dowd JB, Andriano L, Brazel DM, et al. Demographic science aids in understanding the spread and fatality rates of COVID-19. *Proc Natl Acad Sci U S A*. 2020; 117(18):9696-9698.
  12. Figar S, Pagotto V, Luna L, Salto J, Wagner Manslau M, Mistchenko A, Gamarnik A, Gomez Saldano AM, Quiros F. Community-level SARS-CoV-2 Seroprevalence Survey in urban slum dwellers of Buenos Aires City, Argentina: a participatory research. medRxiv 2020.07.14.20153858; [cited 2020 Nov 01]. Available from: <https://www.medrxiv.org/content/10.1101/2020.07.14.20153858v2>.



13. Ministerio de Salud, Gobierno de la Ciudad Autónoma de Buenos Aires. Manejo frente a casos sospechosos y confirmados de coronavirus (COVID 19). V.30. 7 de Junio de 2020. pp 6.
14. Ministerio de Salud, Gobierno de la Ciudad Autónoma de Buenos Aires. Manejo frente a casos sospechosos y confirmados de coronavirus (COVID 19). V.32. 19 de Junio de 2020. pp 16.
15. Ministerio de Salud, Gobierno de la Ciudad Autónoma de Buenos Aires. Actualización de los casos de coronavirus en la Ciudad. [cited 2020 Nov 01]. Available from: <https://www.buenosaires.gob.ar/coronavirus/noticias/actualizacion-de-los-casos-de-coronavirus-en-la-ciudad-buenos-aires>.
16. The Novel Coronavirus Pneumonia Emergency Response Epidemiology Team. The Epidemiological Characteristics of an Outbreak of 2019 Novel Coronavirus Diseases (COVID-19) — China, 2020[J]. China CDC Weekly, 2020, 2(8): 113-122.
17. Livingston E, Bucher K. Coronavirus Disease 2019 (COVID-19) in Italy. JAMA. 2020;323(14):1335.
18. CDC. CDC COVID Data Tracker: Demographic Trends of COVID-19 cases and deaths in the US reported to CDC. Atlanta, GA: US Department of Health and Human Services, CDC; 2020. [cited 2020 Nov 02]. Available from: <https://www.cdc.gov/covid-data-tracker/index.html#demographics>.
19. Götzinger F, Santiago-García B, Noguera-Julián A, Lanasa M, Lancella L, Calò Carducci FI, Gabrovská N, Velizarova S, Prunk P, Osterman V, Krivec U, Lo Vecchio A, Shingadia D, Soriano-Arandes A, Melendo S, Lanari M, Pierantoni L, Wagner N, L'Huillier AG, Heininger U, Ritz N, Bandi S, Krajcar N, Roglič S, Santos

- M, Christiaens C, Creuven M, Buonsenso D, Welch SB, Bogyi M, Brinkmann F, Tebruegge M; ptbnet COVID-19 Study Group. COVID-19 in children and adolescents in Europe: a multinational, multicentre cohort study. *Lancet Child Adolesc Health*. 2020 Sep; 4(9):653-661.
20. Tagarro A, Epalza C, Santos M, Sanz-Santaefemia FJ, Otheo E, Moraleda C, Calvo C. Screening and Severity of Coronavirus Disease 2019 (COVID-19) in Children in Madrid, Spain. *JAMA Pediatr*. 2020 Apr 8:e201346.
21. Kim L, Whitaker M, O'Halloran A, et al. Hospitalization Rates and Characteristics of Children Aged <18 Years Hospitalized with Laboratory-Confirmed COVID-19 - COVID-NET, 14 States, March 1-July 25, 2020. *MMWR Morb Mortal Wkly Rep*. 2020;69(32):1081-1088.
22. Jiang L, Tang K, Levin M, Irfan O, Morris SK, Wilson K, Klein JD, Bhutta ZA. COVID-19 and multisystem inflammatory syndrome in children and adolescents. *Lancet Infect Dis*. 2020 Nov; 20(11):e276-e288.
23. Munro APS, Faust SN. Children are not COVID-19 super spreaders: time to go back to school. *Arch Dis Child*. 2020; 105(7):618-619.

**Table 1. Comorbidities in pediatric patients hospitalized for COVID-19  
(n=204/578)**

| <b>Disease</b>                                                  | <b>n</b> |
|-----------------------------------------------------------------|----------|
| Asthma                                                          | 49       |
| Surgical conditions (appendicitis, testicular torsion, hernias) | 12       |
| Seizures                                                        | 11       |
| Non-progressive chronic encephalopathy                          | 11       |
| Genetic disorders                                               | 9        |
| Tumors                                                          | 8        |
| Tuberculosis                                                    | 8        |
| Other infections (otitis, cellulitis, hepatitis)                | 8        |
| Urinary tract infection                                         | 7        |
| Obesity                                                         | 5        |
| Diabetes mellitus                                               | 5        |
| Thrombocytopenic purpura                                        | 5        |
| Chronic kidney injury                                           | 5        |
| Chronic lung disease/Bronchopulmonary dysplasia                 | 4        |

|                                                 |    |
|-------------------------------------------------|----|
| Congenital heart disease                        | 3  |
| Hemolytic-uremic syndrome                       | 2  |
| Hematologic disease (spherocytosis, hemophilia) | 2  |
| HIV                                             | 2  |
| Other                                           | 48 |

---

**Table 2. Initial symptom of symptomatic patients hospitalized for COVID-19**

**(n=400)**

| <b>Síntoma</b>    | <b>n</b> | <b>%</b> |
|-------------------|----------|----------|
| Fever             | 207      | 51.7     |
| Sore throat       | 49       | 12.2     |
| Cough             | 40       | 10       |
| Rhinorrhea        | 39       | 9.7      |
| Headache          | 37       | 9.2      |
| Diarrhea/vomiting | 35       | 8.7      |
| Dyspnea           | 17       | 4.2      |
| Abdominal pain    | 15       | 3.7      |
| Loss of smell     | 13       | 3.2      |
| Rash              | 6        | 1.5      |
| Loss of taste     | 3        | 0.7      |

(patients could have more than one symptom)

**Table 3. Lab characteristics of children hospitalized for COVID-19**

|                                         | <b>Mean</b> | <b>DS</b> |
|-----------------------------------------|-------------|-----------|
| Hemoglobin (mg/dL)                      | 12.5        | 1.4       |
| White blood cells count (/mL)           | 8,062       | 3,889     |
| Lymphocyte differential count(% )       | 49          | 20        |
| Neutrophil differential count (% )      | 39          | 20        |
| Platelet count (/mL)                    | 289,544     | 106,073   |
| Erythrocyte sedimentation rate (mm/1 h) | 13          | 12        |
| C-reactive protein (mg/dL)              | 14          | 38        |

**Figure 1. Pediatric hospitalizations for COVID-19, according to epidemiological week**

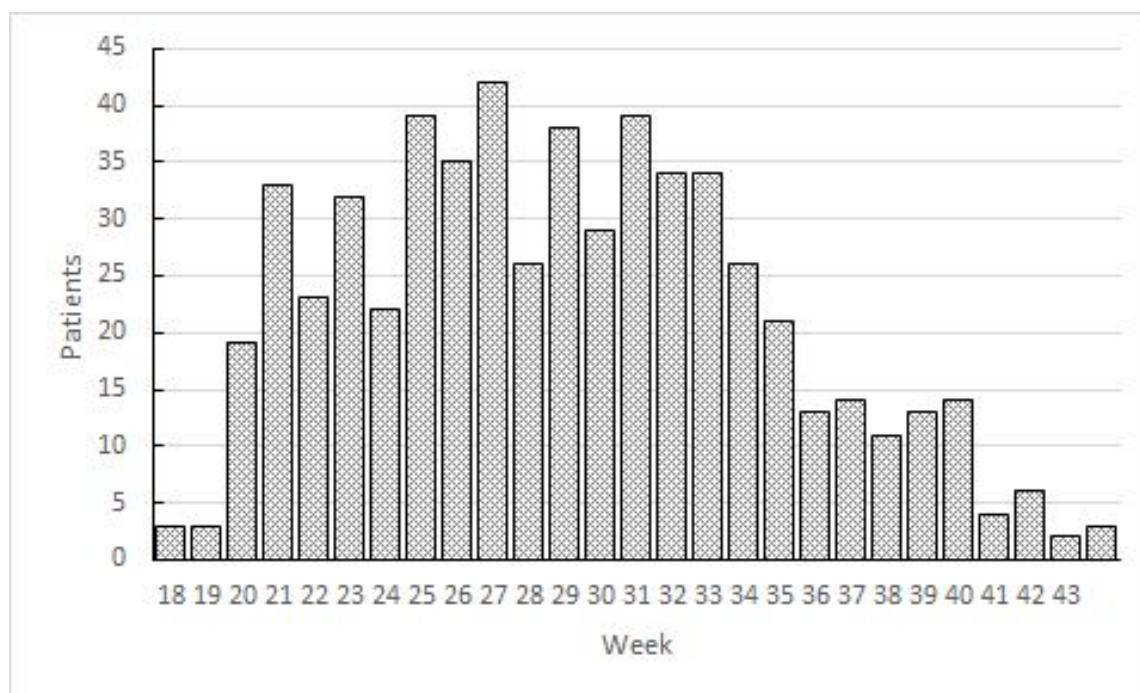

Source: https://www.medrxiv.org/content/10.1101/2020.11.05.20225300v1.full.pdf
